# Supplementary material for: Using Optimization Tools to Explore Stratospheric Aerosol Injection Strategies
Source: Copernicus journal article supplement (doi:10.5194/egusphere-2024-3974), 2025-01-16
Supplement: Supplementary file 1 [file egusphere-2024-3974-supplement.pdf]

## Supplemental Material for: Using Optimization Tools to Explore Stratospheric Aerosol Injection Strategies

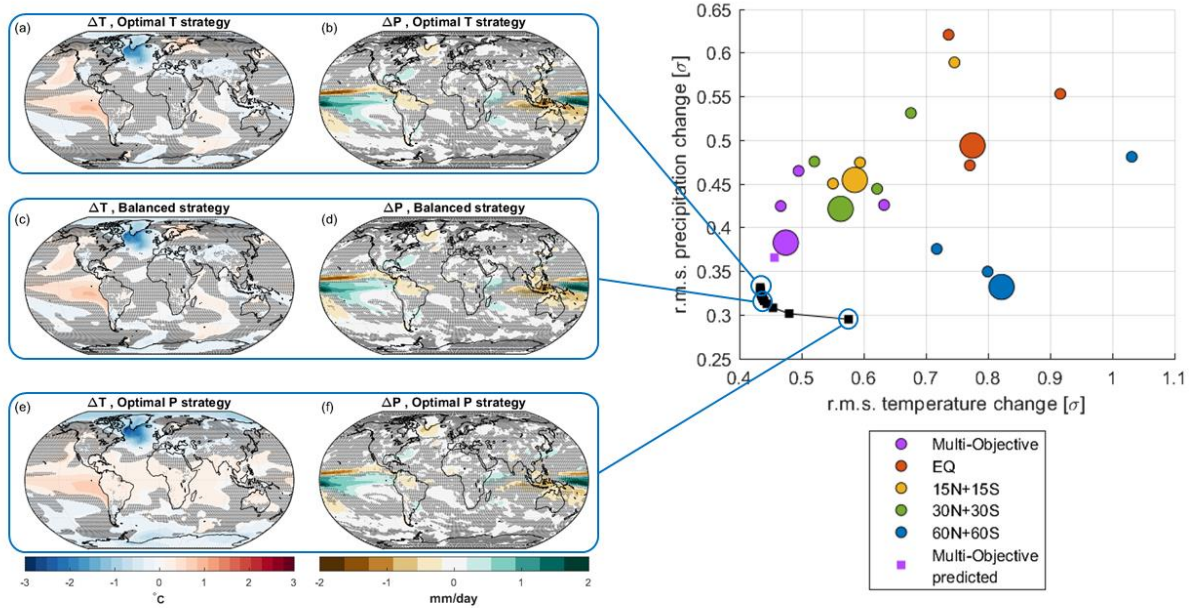

Figure S1: Same as figure 5, but with the optimization metrics normalized by the reference-period standard deviation in each grid cell. Maps on the left show the difference in temperature and precipitation from the reference period for 3 different optimal temperature vs precipitation strategies. The scatter plot on the right shows which points on the Pareto front these strategies refer to, as well as the r.m.s. temperature and precipitation changes in existing strategies. Large circles are ensemble averages, and small circles are individual ensemble members. Note that the maps on the left are shown in absolute units so that the patterns can be more directly compared to figure 4, but the scatter plot on the right is shown in units of standard deviations.

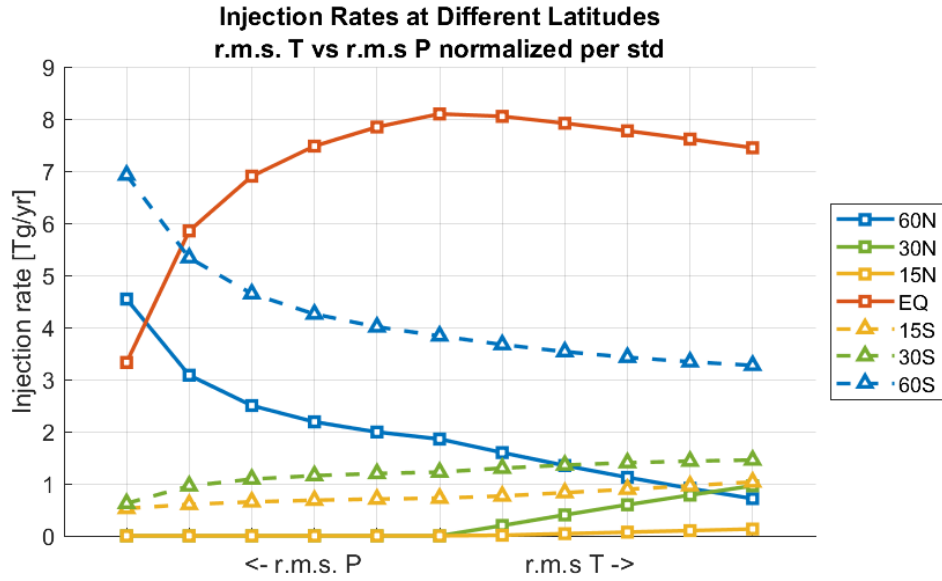

Figure S2: Injection rates throughout the pareto front for r.m.s. temperature vs r.m.s. precipitation, normalized per standard deviation

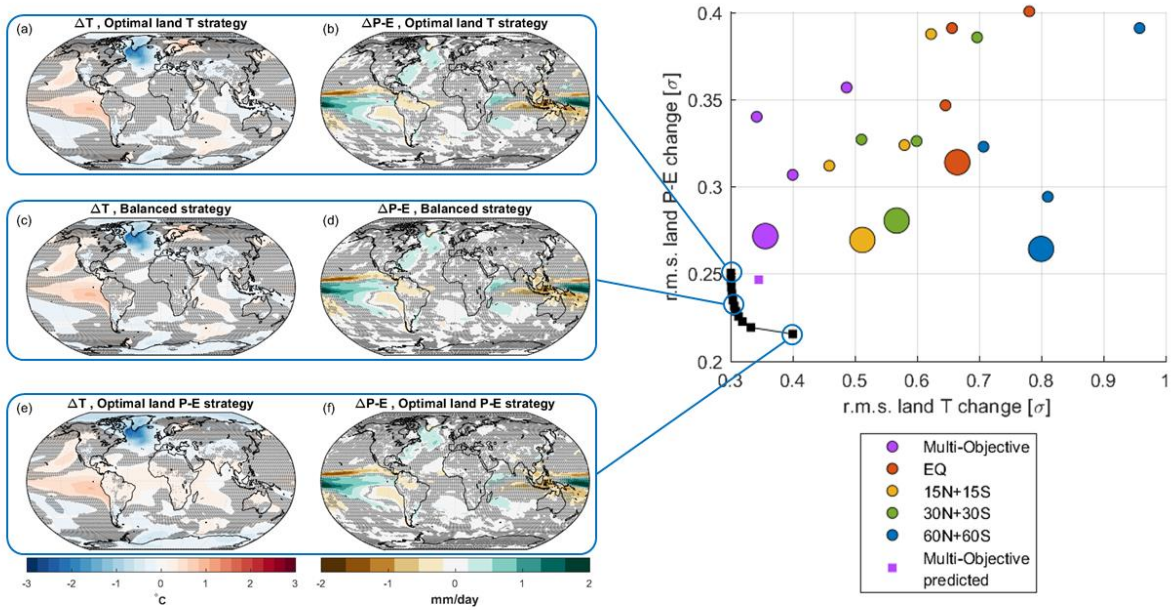

Figure S3: Same as figure S1, but for r.m.s. land temperature vs r.m.s. land precipitation minus evaporation

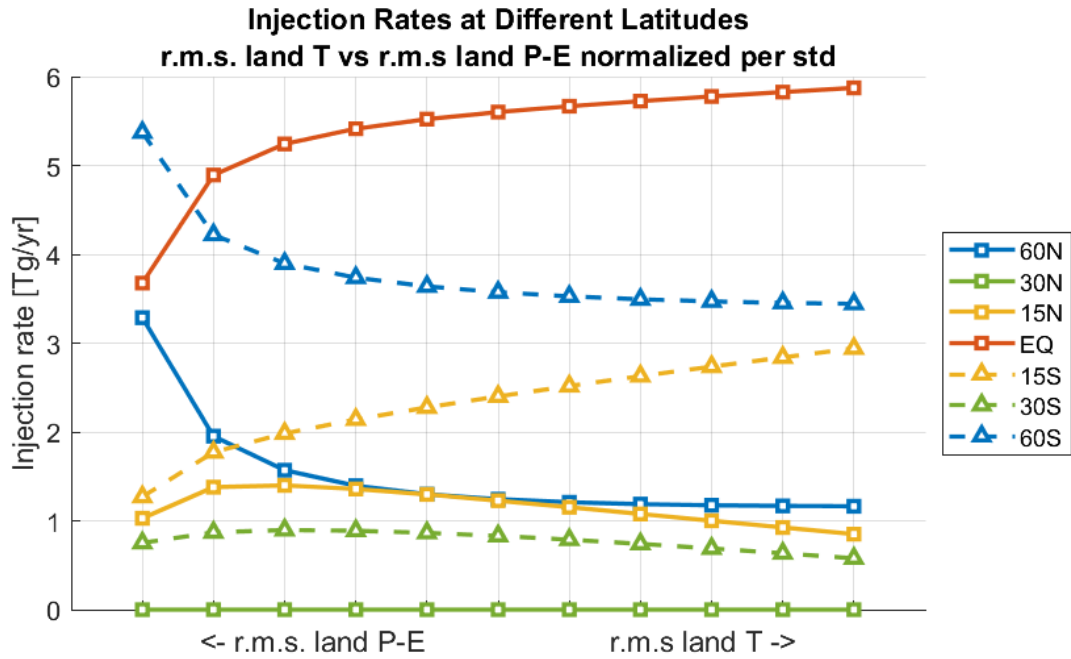

Figure S4: Injection rates throughout the pareto front for r.m.s. land temperature vs r.m.s. land precipitation minus evaporation, normalized per standard deviation
