# Supplementary material for: Using Optimization Tools to Explore Stratospheric Aerosol Injection Strategies
Source: Copernicus journal article supplement (doi:10.5194/egusphere-2024-3974), 2025-01-16
Supplement: Supplementary file [file egusphere-2024-3974-AC1-supplement.pdf]

## Response to Reviewer #1

We thank the reviewer for taking the time to review our manuscript, and for their supportive comments.

Note that in between the time of submission and now, two more ensemble members of the 60N constant injection simulation became available, so we redid the analysis with these instead of the Arctic High simulation. This did not change any of the conclusions, but we now have 3 ensemble members of each of the seven strategies used in this study. Figures and results have been updated accordingly.

Brody et al. are interested in selecting latitudes at which to emit aerosol precursor gas into the stratosphere in order to optimize climate change with regard to some scalar metrics such as temperature or precipitation changes. They do so on the basis of available climate model simulations and apply a simple emulator in the optimisation process.

The study in general is well conducted and the manuscript is well written.

As the only major suggestion, it would be very useful to test the results by implementing the optimal choice of injection into a different Earth system model (see also lines 142-143 that somewhat alludes to this idea).

We agree that simulating one or more of the optimal injection strategies in another climate model would be beneficial. However, we do not have access to other climate models for this project, so this will have to remain outside of the scope of this study. We leave similar analysis in other climate models to future studies, as suggested in the discussion section, lines 398-401.

Else I propose some minor edits.

195 – It would be useful to motivate this surprising use of another, very differently conducted, simulation at this point.

While the “Arctic High” simulation from Lee et al adjusted the injection rate to maintain a sea ice target, the actual injection resulting injection rates were not too dissimilar from a constant 12 Tg/yr; however as we now have access to additional ensemble members of fixed injection for 60N, we now avoid this extra complication and we now use only the 3 ensemble members of the fixed-injection 60N injection simulation.

1114-115 – to this point, the reader assumed the assumption of linearity is “validated” (e.g. abstract, line 11). If it turns out very problematic, this needs to be explained instead of assuring the reader about validation.

We have provided a detailed linear approximation evaluation in Section 3.2 to show that the errors due to linear approximation are generally small compared to internal variability. Of course, the actual responses of the climate system are not linear and linearity is only an approximation; the question is whether the errors introduced from making this approximation are large or not (relative to the differences between existing and optimal strategies, as well as internal variability, for example). If the linear assumption turned out to be an unacceptably bad one, we wouldn't have written this paper.

I121 / Table 1 – acronym “SSI” needs to be explained

Fixed.

I146 / Eq. 1 – a noise/natural variability term is missing

The equation refers only to the forced response, therefore we did not include a natural variability term.

I152 – what quantity related to ITCZ, its annual-mean zonal-mean latitude?

Yes, we are referring to the annual-mean zonal-mean ITCZ. We will clarify the zonal-mean part; annual mean is already stated at the end of the paragraph.

I155 – or higher moments of the quantities, especially extremes would be interesting.

Analyses of the dependency of higher moments, or extreme events, would definitely be of interest, and we will work towards it in future works. However, aside from mentioning this possibility now, we feel like further analyses fall beyond the scope of this work.

I174 – define “adequately” linear

Figure S5 shows the scalar variables used in this study plotted against  $T_0$  for SSP2-4.5. This shows that these variables scale approximately linearly with respect to  $T_0$ , and errors due to nonlinearities are smaller than the noise. Note that for SSI, the linear approximation is only valid for the first few decades, before it approaches zero. This is why 2030-2049 was chosen instead of 2050-2069 as the future time period for SSI.

This will be added to the supplementary material.

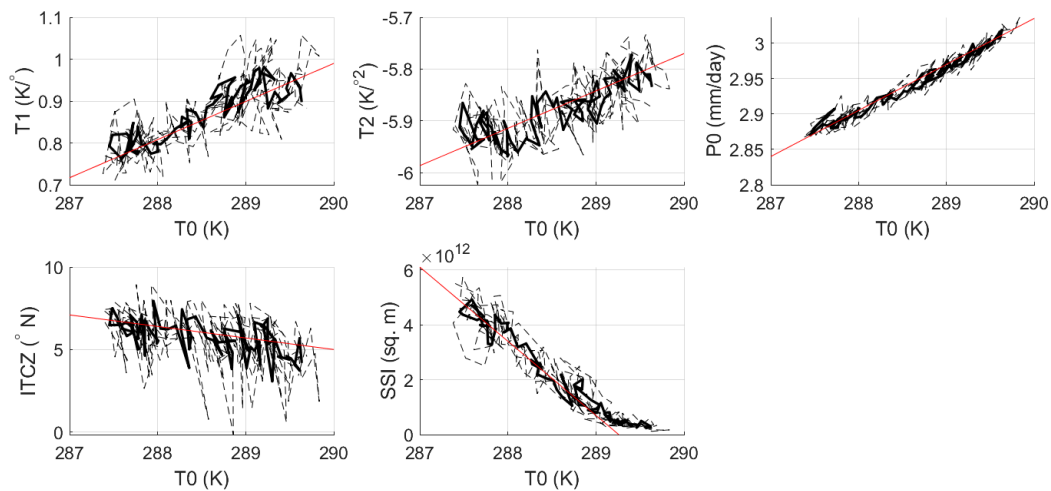

Figure S5: Select variables vs global-mean surface temperature ( $T_0$ ) for the SSP2-4.5 simulations from 2000-2069. Solid black lines are ensemble means, dashed black lines are individual ensemble members, and red lines are a linear fit with the slope equal to the  $\alpha$  values from Table 2.

l179 / Eq. 2 – a noise term is missing

The equation refers only to the forced response.

l184 / Table 2 – “values”. Also I gather  $\alpha$  is for the SSP2-4.5 column, and all other columns list  $\mu$ ? This should better be explained in the caption. The signs in the ITCZ location require explanation.

We will make these clarifications in the caption.

l192 – define  $T_0$  ( $=T_{0,\text{warming}}$ )

We will make this fix.

l202 – How is this possible (in terms of seeding), a negative coefficient (see also line 222)? And also, why such a complicated combination, instead of straightforward combination?

A coefficient of -5% is possible for the 30N simulation because of the +18% coefficient for the 30N+30S simulation, resulting in a positive amount of injection at 30N. (Note that we accidentally switched the injection rates between the NH and SH in the manuscript. The SH should have more injection in the Multi-Objective strategy. This will be fixed) The same reasoning holds for 15N. The reason that such a complicated combination was chosen is that the Multi-objective run ramps up the injection rate over time, so we wanted to use simulations

that also ramp up their injection rates (15N+15S, 30N+30S) as much as possible over simulations with constant injection rates (15N, 15S, 30N, 30S)

[I209 /Table 3 – additional digits required for P\\_0 and SSI.](#)

Number of decimal places for these values were chosen based on the standard error in a consistent manner for each variable.
